# Supplementary material for: Characteristics of Viral Shedding Time in SARS-CoV-2 Infections: A Systematic Review and Meta-Analysis
Source: PubMed Central journal article supplement (PMC8017277; doi:10.3389/fpubh.2021.652842), 2021-03-19
Supplement: Data_Sheet_1.pdf [file Data_Sheet_1.pdf]

**Supplementary table 1. The search strategy of viral shedding time of SARS-CoV-2\***

| <b>Database</b> | <b>Searches</b>                                                                                                                                                                                                                                                                                                                                                                                                                                                                               |
|-----------------|-----------------------------------------------------------------------------------------------------------------------------------------------------------------------------------------------------------------------------------------------------------------------------------------------------------------------------------------------------------------------------------------------------------------------------------------------------------------------------------------------|
| Pubmed          | (((((((severe acute respiratory syndrome coronavirus 2[Supplementary Concept]) OR COVID-19[Supplementary Concept]) OR COVID-19[Text Word]) OR SARS-CoV-2[Text Word]) OR coronavirus disease 2019[Text Word]) OR novel coronavirus[Text Word]) OR coronavirus[Text Word]) AND (((((((shed*[Text Word]) OR (conversion[Text Word])) OR (clearance[Text Word])) OR (carr*[Text Word])) OR (communicable[Text Word])) OR (excret*[Text Word])) OR (secret*[Text Word])) Filters: from 2020 - 2020 |
| Web of Science  | TS: (((((((((severe acute respiratory syndrome coronavirus 2) OR COVID-19) OR SARS-CoV-2) OR coronavirus disease 2019) OR novel coronavirus) OR coronavirus))) AND TS: (((((((shed*) OR (conversion) OR (clearance)) OR (carr*)) OR (communicable)) OR (excret*)) OR (secret*)) Filters: from 2020 - 2020                                                                                                                                                                                     |
| MedRxiv         | (COVID-19 OR 2019-nCoV OR SARS-CoV-2) AND (shed OR conversion OR clearance OR carriage OR communicable OR excrete OR secrete)<br>Filters: 2020/01/01-2020/10/25                                                                                                                                                                                                                                                                                                                               |
| BioRxiv         | (COVID-19 OR 2019-nCoV OR SARS-CoV-2) AND (shed OR conversion OR clearance OR carriage OR communicable OR excrete OR secrete)<br>Filters: 2020/01/01-2020/10/25                                                                                                                                                                                                                                                                                                                               |

\* Only the search strategies of English databases were shown.

**Supplementary table 2. The quality of the included studies**

| <b>First Author, Year</b> | <b>Item 1</b> | <b>Item 2</b> | <b>Item 3</b> | <b>Item 4</b> | <b>Item 5</b> | <b>Item 6</b> | <b>Item 7</b> | <b>Item 8</b> | <b>Item 9</b> | <b>Item 10</b> | <b>Item 11</b> | <b>Total</b> | <b>Quality</b> |
|---------------------------|---------------|---------------|---------------|---------------|---------------|---------------|---------------|---------------|---------------|----------------|----------------|--------------|----------------|
| Cai JH,2020(1)            | 1             | 1             | 1             | 1             | 1             | 0             | 1             | 0             | 0             | 1              | 1              | 8            | High           |
| Xiong XL,2020(2)          | 1             | 1             | 1             | 1             | 1             | 0             | 1             | 0             | 0             | 1              | 1              | 8            | High           |
| Yang MC,2020(3)           | 1             | 1             | 1             | 1             | 1             | 0             | 1             | 0             | 0             | 1              | 1              | 8            | High           |
| Noh, J.Y.,2020(4)         | 1             | 1             | 1             | 1             | 1             | 0             | 1             | 0             | 0             | 1              | 1              | 8            | High           |
| Zheng T,2020(5)           | 1             | 1             | 1             | 1             | 1             | 0             | 1             | 0             | 0             | 1              | 1              | 8            | High           |
| Lee, S.,2020(6)           | 1             | 1             | 1             | 1             | 1             | 0             | 1             | 0             | 0             | 1              | 1              | 8            | High           |
| Song WL,2020(7)           | 1             | 1             | 1             | 1             | 1             | 0             | 1             | 0             | 0             | 1              | 1              | 8            | High           |
| Chen J,2020(8)            | 1             | 1             | 1             | 1             | 1             | 0             | 1             | 0             | 0             | 1              | 1              | 8            | High           |
| Zhu L,2020(9)             | 1             | 1             | 1             | 1             | 1             | 0             | 1             | 0             | 0             | 1              | 1              | 8            | High           |
| Han CQ,2020(10)           | 1             | 1             | 1             | 1             | 1             | 0             | 1             | 0             | 0             | 1              | 1              | 8            | High           |
| Yan XQ,2020(11)           | 1             | 1             | 1             | 1             | 1             | 0             | 1             | 0             | 0             | 1              | 1              | 8            | High           |
| Gong Y,2020(12)           | 1             | 1             | 1             | 1             | 1             | 0             | 1             | 0             | 0             | 1              | 1              | 8            | High           |
| Warabi, Y.,2020(13)       | 1             | 1             | 1             | 1             | 1             | 0             | 1             | 0             | 0             | 1              | 1              | 8            | High           |
| Pan YF,2020(14)           | 1             | 1             | 0             | 1             | 1             | 0             | 1             | 0             | 0             | 1              | 1              | 7            | Medium         |
| Hua CZ,2020(15)           | 1             | 1             | 1             | 1             | 1             | 0             | 1             | 0             | 0             | 1              | 1              | 8            | High           |
| Cano, E.,2020(16)         | 1             | 1             | 0             | 1             | 1             | 0             | 1             | 0             | 0             | 1              | 1              | 7            | Medium         |
| Wu YJ,2020(17)            | 1             | 1             | 1             | 1             | 1             | 0             | 1             | 0             | 0             | 1              | 1              | 8            | High           |
| Otsubo, S.,2020(18)       | 1             | 1             | 0             | 1             | 1             | 0             | 1             | 0             | 0             | 1              | 1              | 7            | Medium         |
| Tan F,2020(19)            | 1             | 1             | 1             | 1             | 1             | 0             | 1             | 0             | 0             | 1              | 1              | 8            | High           |
| Xiao TY,2020(20)          | 1             | 1             | 1             | 1             | 1             | 0             | 1             | 0             | 0             | 1              | 1              | 8            | High           |
| Yao XY,2020(21)           | 1             | 1             | 1             | 1             | 1             | 0             | 1             | 0             | 0             | 1              | 1              | 8            | High           |
| Liu YJ,2020(22)           | 1             | 1             | 1             | 1             | 1             | 0             | 1             | 0             | 0             | 1              | 1              | 8            | High           |
| Shi ZY,2020(23)           | 1             | 1             | 1             | 1             | 1             | 0             | 1             | 0             | 0             | 1              | 1              | 8            | High           |

|                                                                                                                                                                                                                                                                                                                                                                                                                                                                                                                                                                                                                                                                                                                                                                                                                                                                                                                                                                                                                                                                 |   |   |   |   |   |   |   |   |   |   |   |   |      |
|-----------------------------------------------------------------------------------------------------------------------------------------------------------------------------------------------------------------------------------------------------------------------------------------------------------------------------------------------------------------------------------------------------------------------------------------------------------------------------------------------------------------------------------------------------------------------------------------------------------------------------------------------------------------------------------------------------------------------------------------------------------------------------------------------------------------------------------------------------------------------------------------------------------------------------------------------------------------------------------------------------------------------------------------------------------------|---|---|---|---|---|---|---|---|---|---|---|---|------|
| Li L,2020(24)                                                                                                                                                                                                                                                                                                                                                                                                                                                                                                                                                                                                                                                                                                                                                                                                                                                                                                                                                                                                                                                   | 1 | 1 | 1 | 1 | 1 | 0 | 1 | 0 | 0 | 1 | 1 | 8 | High |
| Jiang Y,2020(25)                                                                                                                                                                                                                                                                                                                                                                                                                                                                                                                                                                                                                                                                                                                                                                                                                                                                                                                                                                                                                                                | 1 | 1 | 1 | 1 | 1 | 0 | 1 | 0 | 0 | 1 | 1 | 8 | High |
| Gong HL,2020(26)                                                                                                                                                                                                                                                                                                                                                                                                                                                                                                                                                                                                                                                                                                                                                                                                                                                                                                                                                                                                                                                | 1 | 1 | 1 | 1 | 1 | 0 | 1 | 0 | 0 | 1 | 1 | 8 | High |
| Zhao BN,2020(27)                                                                                                                                                                                                                                                                                                                                                                                                                                                                                                                                                                                                                                                                                                                                                                                                                                                                                                                                                                                                                                                | 1 | 1 | 1 | 1 | 1 | 0 | 1 | 0 | 0 | 1 | 1 | 8 | High |
| Zhang BY,2020(28)                                                                                                                                                                                                                                                                                                                                                                                                                                                                                                                                                                                                                                                                                                                                                                                                                                                                                                                                                                                                                                               | 1 | 1 | 1 | 1 | 1 | 0 | 1 | 0 | 0 | 1 | 1 | 8 | High |
| Xu LX,2020(29)                                                                                                                                                                                                                                                                                                                                                                                                                                                                                                                                                                                                                                                                                                                                                                                                                                                                                                                                                                                                                                                  | 1 | 1 | 1 | 1 | 1 | 0 | 1 | 0 | 0 | 1 | 1 | 8 | High |
| Xie CM,2020(30)                                                                                                                                                                                                                                                                                                                                                                                                                                                                                                                                                                                                                                                                                                                                                                                                                                                                                                                                                                                                                                                 | 1 | 1 | 1 | 1 | 1 | 0 | 1 | 0 | 0 | 1 | 1 | 8 | High |
| Sun LL,2020(31)                                                                                                                                                                                                                                                                                                                                                                                                                                                                                                                                                                                                                                                                                                                                                                                                                                                                                                                                                                                                                                                 | 1 | 1 | 1 | 1 | 1 | 0 | 1 | 0 | 0 | 1 | 1 | 8 | High |
| Ren HJ,2020(32)                                                                                                                                                                                                                                                                                                                                                                                                                                                                                                                                                                                                                                                                                                                                                                                                                                                                                                                                                                                                                                                 | 1 | 1 | 1 | 1 | 1 | 0 | 1 | 0 | 0 | 1 | 1 | 8 | High |
| Ran QH,2020(33)                                                                                                                                                                                                                                                                                                                                                                                                                                                                                                                                                                                                                                                                                                                                                                                                                                                                                                                                                                                                                                                 | 1 | 1 | 1 | 1 | 1 | 0 | 1 | 0 | 0 | 1 | 1 | 8 | High |
| Liu JJ,2020(34)                                                                                                                                                                                                                                                                                                                                                                                                                                                                                                                                                                                                                                                                                                                                                                                                                                                                                                                                                                                                                                                 | 1 | 1 | 1 | 1 | 1 | 0 | 1 | 0 | 0 | 1 | 1 | 8 | High |
| Li N,2020(35)                                                                                                                                                                                                                                                                                                                                                                                                                                                                                                                                                                                                                                                                                                                                                                                                                                                                                                                                                                                                                                                   | 1 | 1 | 1 | 1 | 1 | 0 | 1 | 0 | 0 | 1 | 1 | 8 | High |
| <p>Item 1: Define the source of information (survey, record review); Item 2: List inclusion and exclusion criteria for exposed and unexposed subjects (cases and controls) or refer to previous publications; Item 3: Indicate time period used for identifying patients; Item 4: Indicate whether or not subjects were consecutive if not population-based; Item 5: Indicate if evaluators of subjective components of study were masked to other aspects of the status of the participants; Item 6: Describe any assessments undertaken for quality assurance purposes (e.g., test/retest of primary outcome measurements); Item 7: Explain any patient exclusions from analysis; Item 8: Describe how confounding was assessed and/or controlled; Item 9: If applicable, explain how missing data were handled in the analysis; Item 10: Summarize patient response rates and completeness of data collection; Item 11: Clarify what follow-up, if any, was expected and the percentage of patients for which incomplete data or follow-up was obtained.</p> |   |   |   |   |   |   |   |   |   |   |   |   |      |

**Supplementary table 3. Meta-regression for heterogeneity**

**Mean age**

Mixed-Effects Model (k = 26; tau<sup>2</sup> estimator: REML)

|                                                                    |                      |
|--------------------------------------------------------------------|----------------------|
| tau <sup>2</sup> (estimated amount of residual heterogeneity):     | 0.1284 (SE = 0.0379) |
| tau (square root of estimated tau <sup>2</sup> value):             | 0.3583               |
| I <sup>2</sup> (residual heterogeneity / unaccounted variability): | 99.78%               |
| H <sup>2</sup> (unaccounted variability / sampling variability):   | 460.16               |
| R <sup>2</sup> (amount of heterogeneity accounted for):            | 35.28%               |

Test for Residual Heterogeneity:

QE(df = 24) = 4822.2862, p-val < .0001

Test of Moderators (coefficient 2):

QM(df = 1) = 14.3224, p-val = 0.0002

Model Results:

|         | estimate | se     | zval    | pval   | ci.lb  | ci.ub  |     |
|---------|----------|--------|---------|--------|--------|--------|-----|
| intrept | 2.3082   | 0.1812 | 12.7369 | <.0001 | 1.9530 | 2.6634 | *** |
| age     | 0.015    | 0.004  | 3.7845  | 0.0002 | 0.0072 | 0.0228 | *** |

Signif. codes: 0 '\*\*\*' 0.001 '\*\*' 0.01 '\*' 0.05 '.' 0.1 ' ' 1

**The proportion of the asymptomatic cases**

Mixed-Effects Model (k = 42; tau<sup>2</sup> estimator: REML)

|                                                                    |                      |
|--------------------------------------------------------------------|----------------------|
| tau <sup>2</sup> (estimated amount of residual heterogeneity):     | 0.1737 (SE = 0.0395) |
| tau (square root of estimated tau <sup>2</sup> value):             | 0.4167               |
| I <sup>2</sup> (residual heterogeneity / unaccounted variability): | 99.78%               |
| H <sup>2</sup> (unaccounted variability / sampling variability):   | 461.58               |
| R <sup>2</sup> (amount of heterogeneity accounted for):            | 22.64%               |

Test for Residual Heterogeneity:

QE(df = 40) = 9227.5981, p-val < .0001

Test of Moderators (coefficient 2):

QM(df = 1) = 12.5236, p-val = 0.0004

Model Results:

|         | estimate | se     | zval    | pval   | ci.lb   | ci.ub   |     |
|---------|----------|--------|---------|--------|---------|---------|-----|
| intrept | 2.9743   | 0.074  | 40.1947 | <.0001 | 2.8292  | 3.1193  | *** |
| asym    | -0.0059  | 0.0017 | -3.5389 | 0.0004 | -0.0091 | -0.0026 | *** |

Signif. codes: 0 '\*\*\*' 0.001 '\*\*' 0.01 '\*' 0.05 '.' 0.1 ' ' 1

**Mean age and the proportion of the asymptomatic cases**

Mixed-Effects Model (k = 25; tau<sup>2</sup> estimator: REML)

|                                                                    |                      |
|--------------------------------------------------------------------|----------------------|
| tau <sup>2</sup> (estimated amount of residual heterogeneity):     | 0.1100 (SE = 0.0340) |
| tau (square root of estimated tau <sup>2</sup> value):             | 0.3317               |
| I <sup>2</sup> (residual heterogeneity / unaccounted variability): | 99.72%               |
| H <sup>2</sup> (unaccounted variability / sampling variability):   | 360.21               |
| R <sup>2</sup> (amount of heterogeneity accounted for):            | 44.18%               |

Test for Residual Heterogeneity:

QE(df = 22) = 4524.7241, p-val < .0001

Test of Moderators (coefficients 2:3):

QM(df = 2) = 20.3544, p-val < .0001

Model Results:

|         | estimate | se     | zval    | pval   | ci.lb   | ci.ub  |     |
|---------|----------|--------|---------|--------|---------|--------|-----|
| intrept | 2.5262   | 0.2148 | 11.7619 | <.0001 | 2.1053  | 2.9472 | *** |
| age     | 0.012    | 0.0043 | 2.7932  | 0.0052 | 0.0036  | 0.0204 | **  |
| asym    | -0.0035  | 0.0021 | -1.6235 | 0.1045 | -0.0076 | 0.0007 |     |

Signif. codes: 0 '\*\*\*' 0.001 '\*\*' 0.01 '\*' 0.05 '.' 0.1 ' ' 1

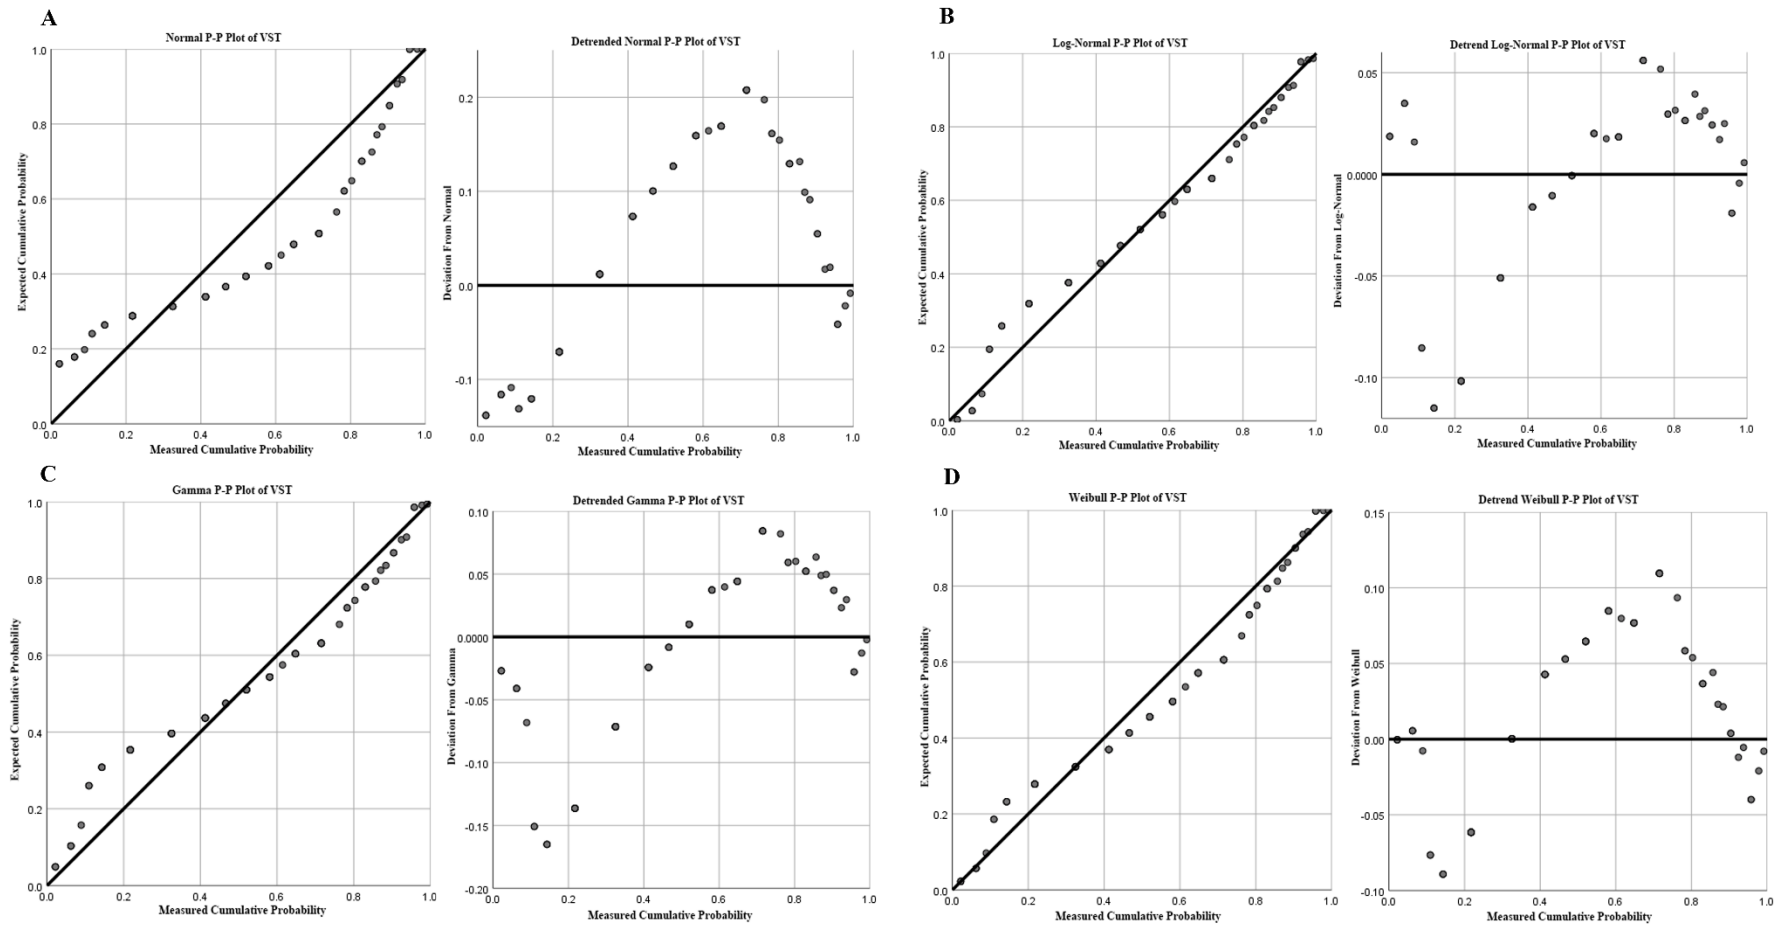

**Supplementary figure 1. The P-P plots of viral shedding time of SARS-CoV-2**

The individual VSTs of 74 persons infected with SARS-COV-2 were extracted from 6 published articles (1,3,7,14,19,21). Compared with the normal distribution, Weibull distribution and Gamma distribution, we found that the distribution type of the VST was approximately in accordance with the log-normal distribution by using the P-P plots.

## References

1. C. Jiehao, X. Jin, L. Daojiong, Y. Zhi, X. Lei, Q. Zhenghai, et al., A Case Series of Children With 2019 Novel Coronavirus Infection: Clinical and Epidemiological Features. *Clinical infectious diseases : an official publication of the Infectious Diseases Society of America* 71 (2020) 1547-1551. doi: 10.1093/cid/ciaa198.
2. X. Xiong, G.T. Chua, S. Chi, M.Y.W. Kwan, W.H. Sang Wong, A. Zhou, et al., A Comparison Between Chinese Children Infected with Coronavirus Disease-2019 and with Severe Acute Respiratory Syndrome 2003. *The Journal of pediatrics* 224 (2020) 30-36. doi: 10.1016/j.jpeds.2020.06.041.
3. M.C. Yang, P.P. Hung, Y.K. Wu, M.Y. Peng, Y.C. Chao, and W.L. Su, A three-generation family cluster with COVID-19 infection: should quarantine be prolonged? *Public health* 185 (2020) 31-33. doi: 10.1016/j.puhe.2020.05.043.
4. J.Y. Noh, J.G. Yoon, H. Seong, W.S. Choi, J.W. Sohn, H.J. Cheong, et al., Asymptomatic infection and atypical manifestations of COVID-19: Comparison of viral shedding duration. *J Infect* (2020). doi: 10.1016/j.jinf.2020.05.035.
5. T. Zheng, C. Yang, H.-Y. Wang, X. Chen, L. Yu, Z.-L. Wu, et al., Clinical characteristics and outcomes of COVID-19 patients with gastrointestinal symptoms admitted to Jiangnan Fangcang Shelter Hospital in Wuhan, China. *Journal of Medical Virology* 92 (2020) 2735-2741. doi: 10.1002/jmv.26146.
6. S. Lee, T. Kim, E. Lee, C. Lee, H. Kim, H. Rhee, et al., Clinical Course and Molecular Viral Shedding Among Asymptomatic and Symptomatic Patients With SARS-CoV-2 Infection in a Community Treatment Center in the Republic of Korea. *JAMA internal medicine* (2020). doi: 10.1001/jamainternmed.2020.3862.
7. W. Song, J. Li, N. Zou, W. Guan, J. Pan, and W. Xu, Clinical features of pediatric patients with coronavirus disease (COVID-19). *J Clin Virol* 127 (2020) 104377. doi: 10.1016/j.jcv.2020.104377.
8. J. Chen, T. Qi, L. Liu, Y. Ling, Z. Qian, T. Li, et al., Clinical progression of patients with COVID-19 in Shanghai, China. *J Infect* 80 (2020) e1-e6. doi: 10.1016/j.jinf.2020.03.004.
9. L. Zhu, N. Gong, B. Liu, X. Lu, D. Chen, S. Chen, et al., Coronavirus Disease 2019 Pneumonia in Immunosuppressed Renal Transplant Recipients: A Summary of 10 Confirmed Cases in Wuhan, China. *European urology* 77 (2020) 748-754. doi: 10.1016/j.eururo.2020.03.039.
10. C. Han, C. Duan, S. Zhang, B. Spiegel, H. Shi, W. Wang, et al., Digestive Symptoms in COVID-19 Patients With Mild Disease Severity: Clinical Presentation, Stool Viral RNA Testing, and Outcomes. *The American journal of gastroenterology* 115 (2020) 916-923. doi: 10.14309/ajg.0000000000000664.
11. X. Yan, X. Han, Y. Fan, Z. Fang, D. Long, and Y. Zhu, Duration of SARS-CoV-2 viral RNA in asymptomatic carriers. *Critical care (London, England)* 24 (2020) 245. doi: 10.1186/s13054-020-02952-0.
12. Y. Gong, L. Guan, Z. Jin, S. Chen, G. Xiang, and B. Gao, Effects of methylprednisolone use on viral genomic nucleic acid negative conversion and CT imaging lesion absorption in COVID-19 patients under 50 years old. *Journal of medical virology* (2020). doi: 10.1002/jmv.26052.
13. Y. Warabi, S. Tobisawa, T. Kawazoe, A. Murayama, R. Norioka, R. Morishima, et al., Effects of oral care on prolonged viral shedding in coronavirus disease 2019 (COVID-19). *Special care in dentistry : official publication of the American Association of Hospital Dentists, the Academy*

- of Dentistry for the Handicapped, and the American Society for Geriatric Dentistry (2020). doi: 10.1111/scd.12498.
14. Y. Pan, X. Yu, X. Du, Q. Li, X. Li, T. Qin, et al., Epidemiological and Clinical Characteristics of 26 Asymptomatic Severe Acute Respiratory Syndrome Coronavirus 2 Carriers. *J Infect Dis* 221 (2020) 1940-1947. doi: 10.1093/infdis/jiaa205.
  15. C.Z. Hua, Z.P. Miao, J.S. Zheng, Q. Huang, Q.F. Sun, H.P. Lu, et al., Epidemiological features and viral shedding in children with SARS-CoV-2 infection. *Journal of medical virology* (2020). doi: 10.1002/jmv.26180.
  16. E. Cano, C. Corsini Campioli, and J.C. O'Horo, Nasopharyngeal SARS-CoV-2 viral RNA shedding in patients with diabetes mellitus. *Endocrine* (2020) 1-2. doi: 10.1007/s12020-020-02516-w.
  17. Y. Wu, C. Guo, L. Tang, Z. Hong, J. Zhou, X. Dong, et al., Prolonged presence of SARS-CoV-2 viral RNA in faecal samples. *The lancet. Gastroenterology & hepatology* 5 (2020) 434-435. doi: 10.1016/s2468-1253(20)30083-2.
  18. S. Otsubo, Y. Aoyama, K. Kinoshita, T. Goto, Y. Otsubo, D. Kamano, et al., Prolonged shedding of SARS-CoV-2 in COVID-19 infected hemodialysis patients. *Therapeutic apheresis and dialysis : official peer-reviewed journal of the International Society for Apheresis, the Japanese Society for Apheresis, the Japanese Society for Dialysis Therapy* (2020). doi: 10.1111/1744-9987.13566.
  19. F. Tan, K. Wang, J. Liu, D. Liu, J. Luo, and R. Zhou, Viral Transmission and Clinical Features in Asymptomatic Carriers of SARS-CoV-2 in Wuhan, China. *Frontiers in medicine* 7 (2020) 547. doi: 10.3389/fmed.2020.00547.
  20. T. Xiao, Y. Wang, J. Yuan, H. Ye, L. Wei, X. Liao, et al., Early viral clearance and antibody kinetics of COVID-19 among asymptomatic carriers. (2020). doi: 10.1101/2020.04.28.20083139.
  21. Y. XY, Familial clustering infection caused by asymptomatic COVID-19 (in Chinese). *Int J Respi* 40 (2020).
  22. Y.J. Liu, P. Chen, Z.S. Liu, Y. Li, H. Du, and J.L. Xu, Clinical features of asymptomatic or subclinical COVID-19 in children (in Chinese). *Zhongguo dang dai er ke za zhi = Chinese journal of contemporary pediatrics* 22 (2020) 578-582. doi: 10.7499/j.issn.1008-8830.2004088.
  23. S. ZY, H. YH, Y. M, D. M, W. Y, L. M, et al., Influencing factors of negative conversion time of viral nucleic acid of nasopharyngeal swabs in patients with novel coronavirus infected pneumonia (in Chinese). *Practical Journal of Clinical Medicine* 17 (2020) 45-48.
  24. L. L, Y. HS, G. CY, W. XJ, L. XL, Z. JY, et al., Traditional Chinese medicine characteristics of 46 patients with COVID-19 (in Chinese). *Journal of Capital Medical University* 41 (2020) 155-160.
  25. J. Y, W. HZ, S. G, D. LJ, O. CR, and R. XM, Clinical ananalysis of corona virus disease 2019: a report of 24 cases (in Chinese). *Journal of Chongqing Medical University* 45 (2020) 968-970.
  26. G. HL, H. HP, Z. X, L. SS, Z. ZH, Z. SF, et al., Related Factors of the Conversion Time of Virus Nucleic Acid Turning Negative in Patients with Coronavirus Disease 2019 and Its Effect on Prognosis (in Chinese). *Herald of Medicine* 39 (2020) 811-814.
  27. Z. BN, L. DF, L. YL, L. LJ, D. Q, C. H, et al., Differences in Laboratory Indicators and Prognosis Between COVID-19 Patients with or without Diabetes Mellitus (in Chinese). *Sichuan Medical Journal* 41 (2020) 913-917.



28. Z. BY, Z. ZY, L. ZH, C. Q, Z. JY, and D. XJ, Retrospective analysis of viral nucleic acid test results of 116 fecal samples from COVID-19 patients. *Jinagsu Medical Journal* 46 (2020) 571-572.
29. X. LX, Clinical characteristics of 59 cases of COVID-19 in Guangzhou (in Chinese). *China Tropical Medicine* 20 (2020).
30. X. CM, Q. P, Z. XP, D. HB, C. SJ, and X. YX, Dynamic changes of IgM and IgG in confirmed COVID-19 cases: detection results analysis (in Chinese). *Chin J Publ Heal* 36 (2020) 1396-1398.
31. S. LL, L. XD, L. SX, N. CZ, P. SG, W. QL, et al., Nucleic acid detection analysis of 71 cases of COVID-19 with biological samples of diferent disease course(in Chinese). *China Tropical Medicine* 20 (2020) 763-766.
32. R. HJ, L. H, S. GX, L. H, B. JW, and T. LX, Clinical characteristics of 2019 novel coronavirus pneumonia in a mobile cabin hospital in Wuhan: analysis of 94 cases (in Chinese). *Chinese Journal of Hygiene Rescue* 6 (2020) 209-213.
33. R. QH, C. H, Z. L, and Z. YC, Analysis of Factors Influencing Viral Shedding Time in Severe and Critical COVID-19 Patients (in Chinese). *Advances in Clinical Medicine* 10 (2020) 1717-1724. doi: 10.12677/acm.2020.108258.
34. L. JJ, Influencing factors for positive duration of viral nucleic acid in patients with severe coronavirus disease 2019 (in Chinese). *Academic Journal of Second Military Medical University* 41 (2020).
35. L. N, X. T, W. XF, Y. SY, C. YQ, J. SY, et al., Chloroquine phosphate accelerates the conversion of nucleic acid to negative in 88 common COVID-19 patients (in Chinese). *The Journal of Practical Medicine* (2020) 1-4.
